# Supplementary material for: Barriers and facilitators to improve safety and efficiency of the ICU discharge process: a mixed methods study
Source: Springer Nature journal article supplement (doi:10.1186/s12913-017-2139-x), 2017-04-04
Supplement: MOESM1 [file 12199780]

**Additional file 1.** Consolidated criteria for reporting qualitative studies (COREQ)

**Consolidated criteria for reporting qualitative studies (COREQ): 32-item checklist**

Developed from:

Tong A, Sainsbury P, Craig J. Consolidated criteria for reporting qualitative research (COREQ): a 32-item checklist for interviews and focus groups. *International Journal for Quality in Health Care*. 2007. Volume 19, Number 6: pp. 349 – 357

| No. Item                                       | Guide questions/description                                                                                                                              | Reported in section                       |
|------------------------------------------------|----------------------------------------------------------------------------------------------------------------------------------------------------------|-------------------------------------------|
| <b>Domain 1: Research team and reflexivity</b> |                                                                                                                                                          |                                           |
| <i>Personal Characteristics</i>                |                                                                                                                                                          |                                           |
| 1. Interviewer/facilitator                     | Which author/s conducted the interview or focus group?                                                                                                   | 5 (individual and focus group interviews) |
| 2. Credentials                                 | What were the researcher's credentials? E.g. PhD, MD                                                                                                     | 5 (individual and focus group interviews) |
| 3. Occupation                                  | What was their occupation at the time of the study?                                                                                                      | Both interviewers are researchers         |
| 4. Gender                                      | Was the researcher male or female?                                                                                                                       | Both interviewers are female              |
| 5. Experience and training                     | What experience or training did the researcher have?                                                                                                     | 5 (individual and focus group interviews) |
| <i>Relationship with participants</i>          |                                                                                                                                                          |                                           |
| 6. Relationship established                    | Was a relationship established prior to study commencement?                                                                                              | 5 (individual and focus group interviews) |
| 7. Participant knowledge of the interviewer    | What did the participants know about the researcher? e.g. personal goals, reasons for doing the research                                                 | 5 (individual and focus group interviews) |
| 8. Interviewer characteristics                 | What characteristics were reported about the interviewer/facilitator? e.g. Bias, assumptions, reasons and interests in the research topic                | 4 (individual and focus group interviews) |
| <b>Domain 2: study design</b>                  |                                                                                                                                                          |                                           |
| <i>Theoretical framework</i>                   |                                                                                                                                                          |                                           |
| 9. Methodological orientation and Theory       | What methodological orientation was stated to underpin the study? e.g. grounded theory, discourse analysis, ethnography, phenomenology, content analysis | 6 (data analysis)                         |
| <i>Participant selection</i>                   |                                                                                                                                                          |                                           |

|                                            |                                                                                          |                                                |
|--------------------------------------------|------------------------------------------------------------------------------------------|------------------------------------------------|
| 10. Sampling                               | How were participants selected?<br>e.g. purposive, convenience,<br>consecutive, snowball | 4-5 (individual and focus<br>group interviews) |
| 11. Method of approach                     | How were participants<br>approached? e.g. face-to-face,<br>telephone, mail, email        | 4-5 (individual and focus<br>group interviews) |
| 12. Sample size                            | How many participants were in the<br>study?                                              | 8 (characteristics of<br>respondents)          |
| 13. Non-participation                      | How many people refused to<br>participate or dropped out?<br>Reasons?                    | 8 (characteristics of<br>respondents)          |
| <i>Setting</i>                             |                                                                                          |                                                |
| 14. Setting of data collection             | Where was the data collected? e.g.<br>home, clinic, workplace                            | 4-5 (individual and focus<br>group interviews) |
| 15. Presence of non-<br>participants       | Was anyone else present besides<br>the participants and researchers?                     | 5 (individual and focus group<br>interviews)   |
| 16. Description of sample                  | What are the important<br>characteristics of the sample? e.g.<br>demographic data, date  | 8 (characteristics of<br>respondents)          |
| <i>Data collection</i>                     |                                                                                          |                                                |
| 17. Interview guide                        | Were questions, prompts, guides<br>provided by the authors? Was it<br>pilot tested?      | 4-5 (individual and focus<br>group interviews) |
| 18. Repeat interviews                      | Were repeat inter views carried<br>out? If yes, how many?                                | Not applicable                                 |
| 19. Audio/visual recording                 | Did the research use audio or<br>visual recording to collect the<br>data?                | 4-5 (individual and focus<br>group interviews) |
| 20. Field notes                            | Were field notes made during<br>and/or after the interview or focus<br>group?            | 4-5 (individual and focus<br>group interviews) |
| 21. Duration                               | What was the duration of the inter<br>views or focus group?                              | 8 (characteristics of<br>respondents)          |
| 22. Data saturation                        | Was data saturation discussed?                                                           | 5 (individual and focus group<br>interviews)   |
| 23. Transcripts returned                   | Were transcripts returned to<br>participants for comment and/or<br>correction?           | 5 (individual and focus group<br>interviews)   |
| <b>Domain 3: analysis and<br/>findings</b> |                                                                                          |                                                |
| <i>Data analysis</i>                       |                                                                                          |                                                |
| 24. Number of data coders                  | How many data coders coded the<br>data?                                                  | 7 (data analysis)                              |
| 25. Description of the coding<br>tree      | Did authors provide a description<br>of the coding tree?                                 | 26 (table 3)                                   |
| 26. Derivation of themes                   | Were themes identified in advance                                                        | 6 (data analysis)                              |

|                                  |                                                                                                                                 |                   |
|----------------------------------|---------------------------------------------------------------------------------------------------------------------------------|-------------------|
|                                  | or derived from the data?                                                                                                       |                   |
| 27. Software                     | What software, if applicable, was used to manage the data?                                                                      | 6 (data analysis) |
| 28. Participant checking         | Did participants provide feedback on the findings?                                                                              | No                |
| <i>Reporting</i>                 |                                                                                                                                 |                   |
| 29. Quotations presented         | Were participant quotations presented to illustrate the themes/findings? Was each quotation identified? e.g. participant number | 9-12 (results)    |
| 30. Data and findings consistent | Was there consistency between the data presented and the findings?                                                              | 9-12 (results)    |
| 31. Clarity of major themes      | Were major themes clearly presented in the findings?                                                                            | 9-12 (results)    |
| 32. Clarity of minor themes      | Is there a description of diverse cases or discussion of minor themes?                                                          | 9-12 (results)    |
