# Supplementary material for: Barriers and facilitators to improve safety and efficiency of the ICU discharge process: a mixed methods study
Source: BMC Health Serv Res. 2017 Apr 4;17:251. doi: 10.1186/s12913-017-2139-x (PMC5381117; doi:10.1186/s12913-017-2139-x)
Supplement: Supplementary file 4 — Subgroup analyses. (PDF 468 kb) [file 12913_2017_2139_MOESM4_ESM.pdf]

#### Additional file 4 Subgroup analyses

Question 3: 'I think that improving the ICU discharge process deserves more attention from the management.'

| Hospital type          | Disagree        | Agree      | Total     | logistic regression (p) |
|------------------------|-----------------|------------|-----------|-------------------------|
| Academic               | 6 (14.0)        | 37 (86.0)  | 43 (100)  | 0.010                   |
| Teaching               | 15 (22.1)       | 53 (77.3)  | 68 (100)  | 0.052                   |
| General                | 19 (38.8)       | 30 (61.2)  | 49 (100)  |                         |
| Total                  | 40 (25.0) (ref) | 120 (75.0) | 160 (100) |                         |
| Pearson Chi-square (p) | .018            |            |           |                         |

Question 3: 'I think that improving the ICU discharge process deserves more attention from the management.'

| ICU level              | Disagree        | Agree      | Total     | logistic regression (p) |
|------------------------|-----------------|------------|-----------|-------------------------|
| Level 1                | 15 (42.9) (ref) | 20 (57.1)  | 35 (100)  |                         |
| Level 2                | 8 (16.7)        | 40 (83.3)  | 48 (100)  | 0.010                   |
| Level 3                | 17 (21.8)       | 61 (78.2)  | 78 (100)  | 0.024                   |
| Total                  | 40 (24.8)       | 121 (75.2) | 161 (100) |                         |
| Pearson Chi-square (p) | .017            |            |           |                         |

Question 4: 'I think that the size of my hospital makes it more difficult to improve the ICU discharge process.'

| Age                    | Disagree        | Agree     | Total     | logistic regression (p) |
|------------------------|-----------------|-----------|-----------|-------------------------|
| =<40 (%)               | 34 (60.7) (ref) | 22 (39.3) | 56 (100)  |                         |
| 41-50 (%)              | 54 (80.6)       | 13 (19.4) | 67 (100)  | 0.017                   |
| >50 (%)                | 26 (78.8)       | 7 (21.2)  | 33 (100)  | 0.083                   |
| Total                  | 114 (73.8)      | 42 (26.9) | 156 (100) |                         |
| Pearson Chi-square (p) | .033            |           |           |                         |

Question 4: 'I think that the size of my hospital makes it more difficult to improve the ICU discharge process.'

| Hospital type          | Disagree        | Agree     | Total     | logistic regression (p) |
|------------------------|-----------------|-----------|-----------|-------------------------|
| Academic               | 19 (42.2) (ref) | 26 (57.8) | 45 (100)  |                         |
| Teaching               | 56 (80.0)       | 14 (20.0) | 70 (100)  | 0.000                   |
| General                | 39 (95.1)       | 2 (4.9)   | 41 (100)  | 0.000                   |
| Total                  | 114 (73.1)      | 42 (26.9) | 156 (100) |                         |
| Pearson Chi-square (p) | .000            |           |           |                         |

| Question 4: 'I think that the size of my hospital makes it more difficult to improve the ICU discharge process.' |                 |           |           |                         |
|------------------------------------------------------------------------------------------------------------------|-----------------|-----------|-----------|-------------------------|
| ICU level                                                                                                        | Disagree        | Agree     | Total     | logistic regression (p) |
| Level 1                                                                                                          | 23 (82.1)       | 5 (17.9)  | 28 (100)  | 0.029                   |
| Level 2                                                                                                          | 44 (93.6)       | 3 (6.4)   | 48 (100)  | 0.000                   |
| Level 3                                                                                                          | 48 (58.5) (ref) | 34 (41.5) | 82 (100)  |                         |
| Total                                                                                                            | 115 (73.2)      | 42 (26.8) | 157 (100) |                         |
| Pearson Chi-square (p)                                                                                           | .000            |           |           |                         |

| Question 4: 'I think that the size of my hospital makes it more difficult to improve the ICU discharge process.' |                 |           |           |                         |
|------------------------------------------------------------------------------------------------------------------|-----------------|-----------|-----------|-------------------------|
| No. ICU beds                                                                                                     | Disagree        | Agree     | Total     | logistic regression (p) |
| =< 10                                                                                                            | 32 (94.1)       | 2 (5.9)   | 34 (100)  | 0.001                   |
| 11-25                                                                                                            | 55 (78.6)       | 15 (21.4) | 70 (100)  | 0.003                   |
| >25                                                                                                              | 28 (52.8) (ref) | 25 (47.2) | 53 (100)  |                         |
| Total                                                                                                            | 115 (73.2)      | 42 (26.8) | 157 (100) |                         |
| Pearson Chi-square (p)                                                                                           | .000            |           |           |                         |

| Question 5: 'I think that the sickest patient should be the priority of the ICU physician. Patients who are almost ready for ICU discharge are of less importance.' |                 |           |           |                         |
|---------------------------------------------------------------------------------------------------------------------------------------------------------------------|-----------------|-----------|-----------|-------------------------|
| ICU level                                                                                                                                                           | Disagree        | Agree     | Total     | logistic regression (p) |
| Level 1                                                                                                                                                             | 28 (80.0)       | 7 (20.0)  | 35 (100)  | 0.026                   |
| Level 2                                                                                                                                                             | 46 (97.9) (ref) | 1 (2.1)   | 47 (100)  |                         |
| Level 3                                                                                                                                                             | 69 (84.1)       | 13 (15.9) | 82 (100)  | 0.41                    |
| Total                                                                                                                                                               | 143 (87.2)      | 21 (12.8) | 164 (100) |                         |
| Pearson Chi-square (p)                                                                                                                                              | .029            |           |           |                         |

| Question 8: 'I think that there is room to improve the communication between ICU and general ward.' |               |            |           |                         |
|-----------------------------------------------------------------------------------------------------|---------------|------------|-----------|-------------------------|
| Age                                                                                                 | Disagree      | Agree      | Total     | logistic regression (p) |
| Age =<40 (%)                                                                                        | 2 (3.4) (ref) | 57 (96.6)  | 59 (100)  |                         |
| Age 41-50 (%)                                                                                       | 12 (17.4)     | 57 (82.6)  | 69 (100)  | 0.023                   |
| Age >50 (%)                                                                                         | 5 (14.3)      | 30 (85.7)  | 35 (100)  | 0.072                   |
| Total                                                                                               | 19 (11.7)     | 144 (88.3) | 163 (100) |                         |
| Pearson Chi-square (p)                                                                              | .042          |            |           |                         |

| Question 8: 'I think that there is room to improve the communication between ICU and general ward.' |                |            |           |                         |
|-----------------------------------------------------------------------------------------------------|----------------|------------|-----------|-------------------------|
| No. ICU beds                                                                                        | Disagree       | Agree      | Total     | logistic regression (p) |
| =< 10                                                                                               | 9 (22.5) (ref) | 31 (77.5)  | 40 (100)  |                         |
| 11-25                                                                                               | 5 (7.1)        | 65 (92.9)  | 70 (100)  | 0.027                   |
| >25                                                                                                 | 5 (9.4)        | 48 (90.6)  | 53 (100)  | 0.089                   |
| Total                                                                                               | 19 (11.7)      | 144 (88.3) | 163 (100) |                         |
| Pearson Chi-square (p)                                                                              | .045           |            |           |                         |

| Question 9: 'I do sometimes overestimate the possibilities on a general ward.' |                 |            |           |                         |
|--------------------------------------------------------------------------------|-----------------|------------|-----------|-------------------------|
| Hospital type                                                                  | Disagree        | Agree      | Total     | logistic regression (p) |
| Academic                                                                       | 8 (18.2)        | 36 (81.8)  | 44 (100)  | 0.050                   |
| Teaching                                                                       | 11 (16.2)       | 57 (83.8)  | 68 (100)  | 0.013                   |
| General                                                                        | 18 (36.7) (ref) | 31 (63.3)  | 49 (100)  |                         |
| Total                                                                          | 37 (23.0)       | 124 (77.0) | 161 (100) |                         |
| Pearson Chi-square (p)                                                         | .023            |            |           |                         |

| Question 11: 'I've never seen written ICU discharge criteria on our ICU.' |                 |           |           |                         |
|---------------------------------------------------------------------------|-----------------|-----------|-----------|-------------------------|
| Age                                                                       | Disagree        | Agree     | Total     | logistic regression (p) |
| =<40 (%)                                                                  | 35 (58.3) (ref) | 25 (41.7) | 60 (100)  |                         |
| 41-50 (%)                                                                 | 60 (88.2)       | 8 (11.8)  | 68 (100)  | 0.000                   |
| >50 (%)                                                                   | 28 (82.4)       | 6 (17.6)  | 34 (100)  | 0.021                   |
| Total                                                                     | 123 (75.9)      | 39 (24.1) | 162 (100) |                         |
| Pearson Chi-square (p)                                                    | .000            |           |           |                         |

| Question 11: 'I've never seen written ICU discharge criteria on our ICU.' |                 |           |           |                         |
|---------------------------------------------------------------------------|-----------------|-----------|-----------|-------------------------|
| Work experience                                                           | Disagree        | Agree     | Total     | logistic regression (p) |
| =<5 (%)                                                                   | 34 (56.7)       | 26 (43.3) | 60 (100)  | 0.000                   |
| 6-15 (%)                                                                  | 66 (91.7) (ref) | 6 (8.3)   | 72 (100)  |                         |
| >15 (%)                                                                   | 17 (73.9)       | 6 (26.1)  | 23 (100)  | 0.034                   |
| Total                                                                     | 117 (75.5)      | 38 (24.5) | 155 (100) |                         |
| Pearson Chi-square (p)                                                    | .000            |           |           |                         |

| Question 16: 'I think that planning the discharge of an ICU patient 24 hours in advance is not feasible in daily practice, because the time between the decision to discharge and actual handover is often less than 24 hours.' |                 |            |           |                         |
|---------------------------------------------------------------------------------------------------------------------------------------------------------------------------------------------------------------------------------|-----------------|------------|-----------|-------------------------|
| Work experience                                                                                                                                                                                                                 | Disagree        | Agree      | Total     | logistic regression (p) |
| =<5 (%)                                                                                                                                                                                                                         | 15 (25.4)       | 44 (74.6)  | 59 (100)  | 0.022                   |
| 6-15 (%)                                                                                                                                                                                                                        | 32 (45.1) (ref) | 39 (54.9)  | 71 (100)  |                         |
| >15 (%)                                                                                                                                                                                                                         | 4 (16.0)        | 21 (84.0)  | 25 (100)  | 0.014                   |
| Total                                                                                                                                                                                                                           | 51 (32.9)       | 104 (67.1) | 155 (100) |                         |
| Pearson Chi-square (p)                                                                                                                                                                                                          | .009            |            |           |                         |

Question 17: 'I think that when making an up-to-date medication overview at ICU discharge a electronic patient file is indispensable.'

| Work experience        | Disagree        | Agree      | Total     | logistic regression (p) |
|------------------------|-----------------|------------|-----------|-------------------------|
| =<5 (%)                | 7 (11.9)        | 52 (88.1)  | 59 (100)  | 0.009                   |
| 6-15 (%)               | 23 (31.9) (ref) | 49 (68.1)  | 72 (100)  |                         |
| >15 (%)                | 2 (8.7)         | 21 (91.3)  | 23 (100)  | 0.041                   |
| Total                  | 32 (20.8)       | 122 (79.2) | 154 (100) |                         |
| Pearson Chi-square (p) | .006            |            |           |                         |

Question 18: 'I think a checklist to structure the verbal handover is useful.'

| Age                    | Disagree       | Agree      | Total     | logistic regression (p) |
|------------------------|----------------|------------|-----------|-------------------------|
| =<40 (%)               | 0 (0.0)        | 58 (100)   | 58 (100)  | -*                      |
| 41-50 (%)              | 7 (10.4) (ref) | 60 (89.6)  | 57 (100)  |                         |
| >50 (%)                | 0 (0.0)        | 34 (100)   | 34 (100)  |                         |
| Total                  | 7 (4.4)        | 152 (95.6) | 159 (100) | -*                      |
| Pearson Chi-square (p) | .007           |            |           |                         |

\* Impossible to perform logistic regression because of empty fields.

Question 22: 'In my opinion it is organisationally impossible to organise step down facilities.'

| Work experience        | Disagree        | Agree     | Total     | logistic regression (p) |
|------------------------|-----------------|-----------|-----------|-------------------------|
| =<5 (%)                | 18 (32.7)       | 37 (67.3) | 55 (100)  | 0.009                   |
| 6-15 (%)               | 34 (49.3)       | 35 (50.7) | 69 (100)  | 0.166                   |
| >15 (%)                | 14 (66.7) (ref) | 7 (33.3)  | 21 (100)  |                         |
| Total                  | 66 (45.5)       | 79 (54.5) | 145 (100) |                         |
| Pearson Chi-square (p) | .020            |           |           |                         |

Question 25: 'I think that relocating ICU tasks to the wards by a consulting ICU nurse is not desirable.'

| Age                    | Disagree        | Agree     | Total     | logistic regression (p) |
|------------------------|-----------------|-----------|-----------|-------------------------|
| =<40 (%)               | 44 (73.3) (ref) | 16 (26.7) | 60 (100)  |                         |
| 41-50 (%)              | 40 (58.0)       | 29 (42.0) | 69 (100)  | 0.070                   |
| >50 (%)                | 16 (45.7)       | 19 (54.3) | 35 (100)  | 0.008                   |
| Total                  | 100 (61.0)      | 64 (39.0) | 164 (100) |                         |
| Pearson Chi-square (p) | .023            |           |           |                         |

Question 26: 'I think that because of an insufficient nursing staff it is not feasible to monitor post-ICU patient on the wards.'

| Gender                 | Disagree  | Agree     | Total     |
|------------------------|-----------|-----------|-----------|
| Male (%)               | 58 (58.6) | 41 (41.4) | 99 (100)  |
| Female (%)             | 24 (42.1) | 33 (57.9) | 56 (100)  |
| Total                  | 82 (52.6) | 74 (47.7) | 156 (100) |
| Pearson Chi-square (p) | .047      |           |           |
